# Supplementary material for: New 30 m resolution Hong Kong climate, vegetation, and topography rasters indicate greater spatial variation than global grids within an urban mosaic
Source: Copernicus journal article supplement (doi:10.5194/essd-11-1083-2019), 2019-07-22
Supplement: Supplementary file 1 [file essd-11-1083-2019-supplement.pdf]

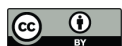

## *Supplement of*

# **New 30 m resolution Hong Kong climate, vegetation, and topography rasters indicate greater spatial variation than global grids within an urban mosaic**

**Brett Morgan and Benoît Guénard**

*Correspondence to:* Brett Morgan ([brettmorgan2@gmail.com](mailto:brettmorgan2@gmail.com))

The copyright of individual parts of the supplement might differ from the CC BY 4.0 License.

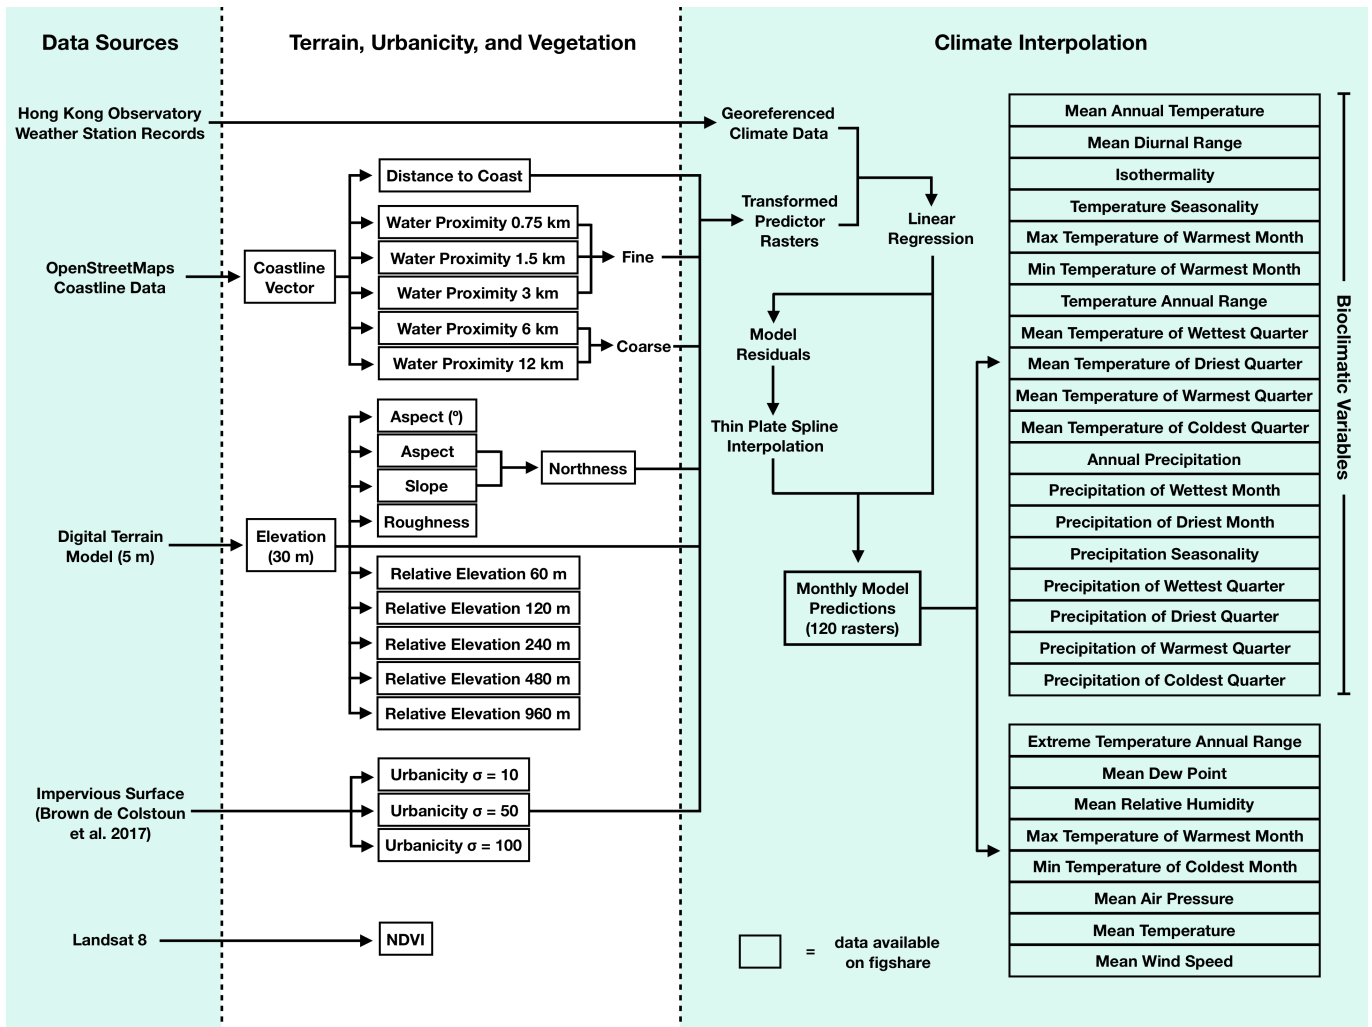

**Figure S1.** Schematic of data products and the sources that informed them. Items enclosed in a box represent the files available for download from the figshare repository.

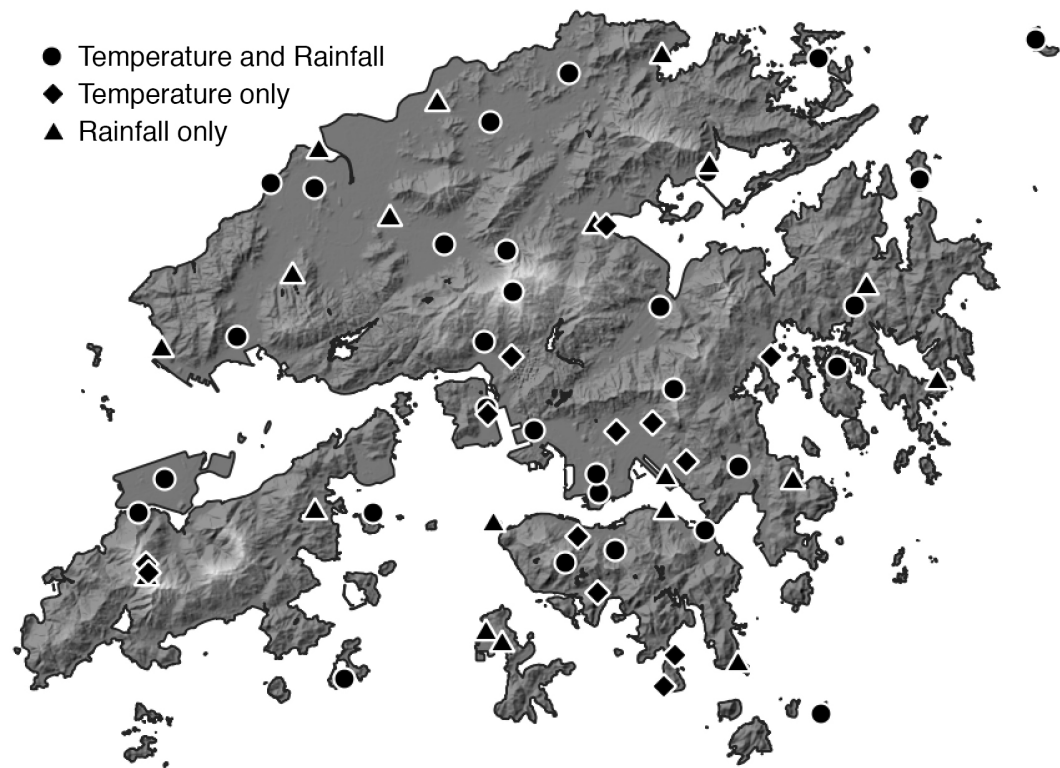

**Figure S2.** Permanent weather stations operated by the Hong Kong Observatory. Symbols indicate what type of data is available from each station: temperature, rainfall, or both.
